# Supplementary material for: Molecular profiling of individual FDA-approved clinical drugs identifies modulators of nonsense-mediated mRNA decay
Source: PubMed Central journal article supplement — Mol Ther Nucleic Acids. 2021 Dec 10;27:304–18. doi: 10.1016/j.omtn.2021.12.003 (PMC8718828; doi:10.1016/j.omtn.2021.12.003), 2021-12-10
Supplement: mmc1.pdf [file mmc1.pdf]

OMTN, Volume 27

## **Supplemental information**

### **Molecular profiling of individual FDA-approved clinical drugs identifies modulators of nonsense-mediated mRNA decay**

**Jingrong Zhao, Zhelin Li, Ruchira Puri, Kelvin Liu, Israel Nunez, Liang Chen, and Sika Zheng**

## **Supplementary Information**

### **Supplementary Table Captions**

**Table S1:** NCATS Clinical Collection Drug.

**Table S2:** Raw data of all drug treatment.

**Table S3:** Primer sequence and location information.

**Table S4:** P\_Fisher and P\_permutation of all drug.

**Figure S1**

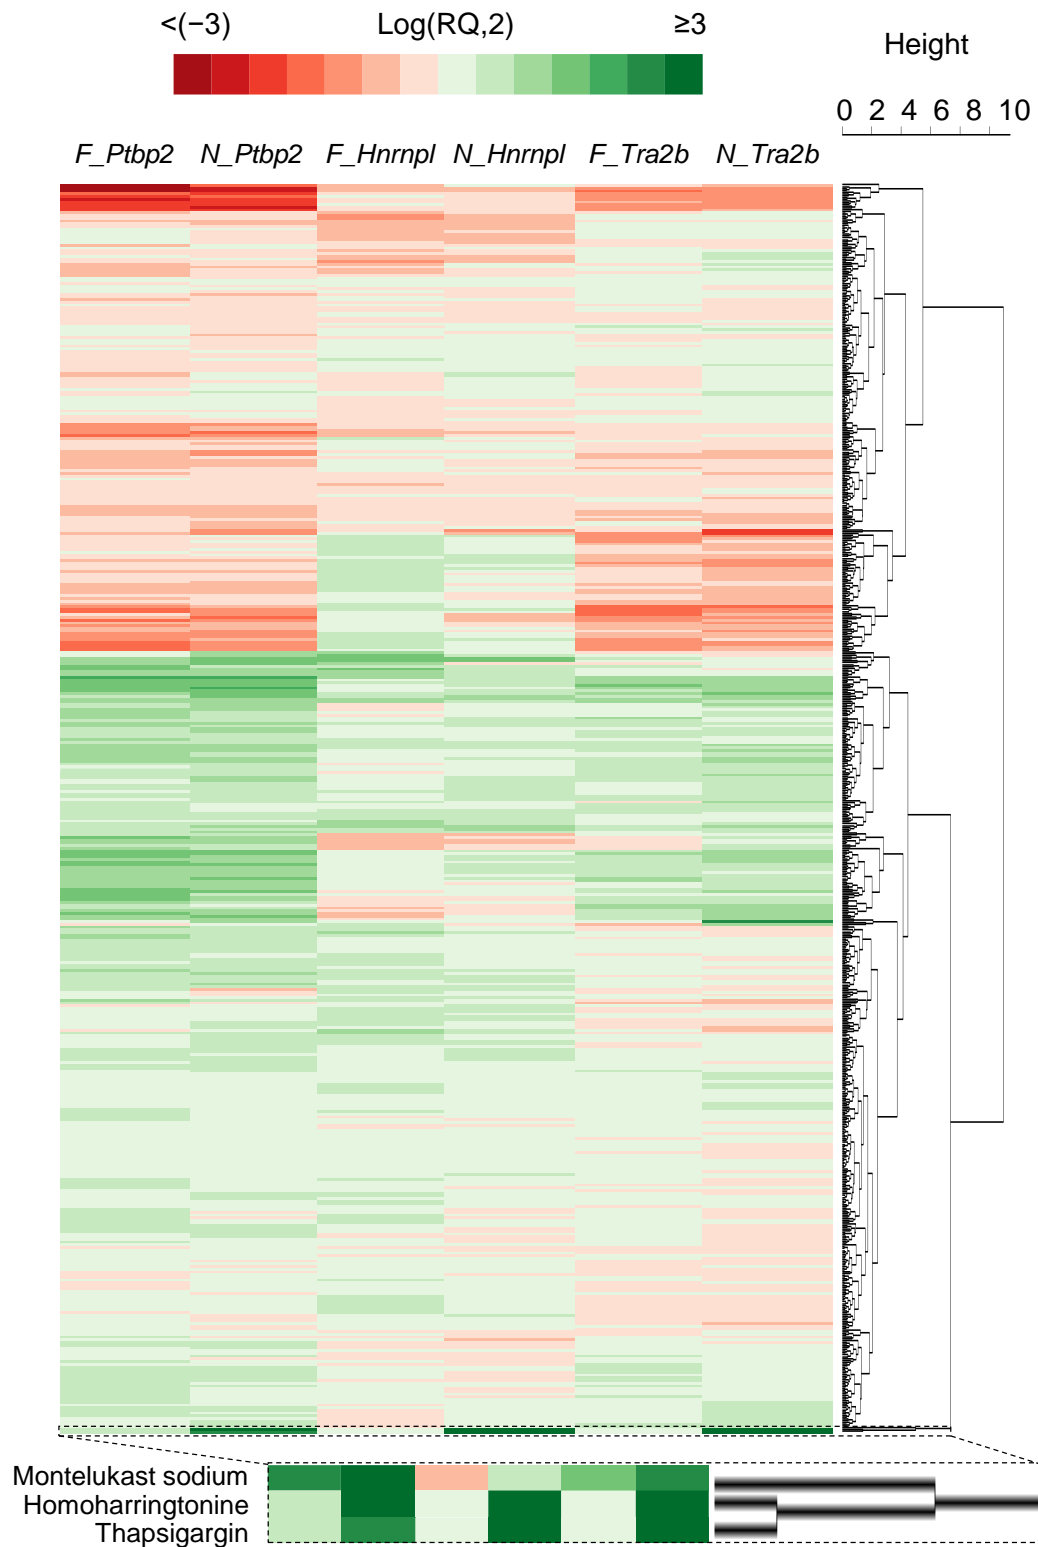

**Figure S1.** Visualized hierarchical clustering of reporter expression level after FDA-approved drugs administration.

Normalized expression level changes ( $\log_2$ ) from all drugs were clustered and visualized in a heatmap. Three drugs, thapsigargin, homoharringtonine, and montelukast sodium, with distinct responses and placed at the bottom, were shown as a subset.

**Figure S2**

|                 | Transcription inhibition | Transcription induction |
|-----------------|--------------------------|-------------------------|
| NMD repression  | Non-NMD ↓<br>NMD ↑ → ↓   | Non-NMD ↑<br>NMD ↑ ↑    |
| NMD enhancement | Non-NMD ↓<br>NMD ↓ ↓     | Non-NMD ↑<br>NMD ↑ → ↓  |

**Figure S2.** Combined transcriptional and NMD regulation lead to diverse scenarios of reporter gene expression changes.

**Figure S3**

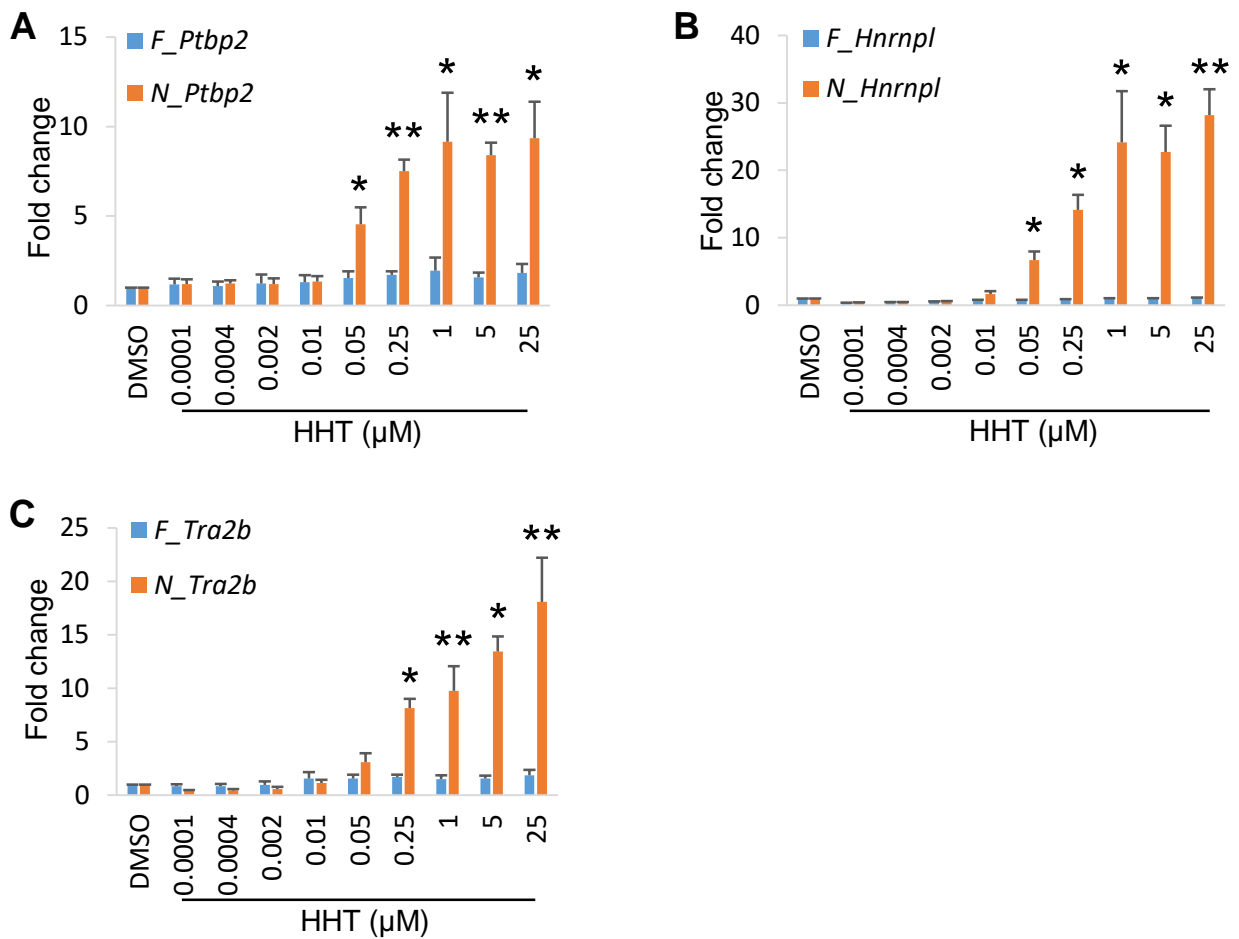

**Figure S3.** HHT inhibits NMD in mouse NPCs.

(A-C) HHT treatment in NPCs induced dosage dependent expression changes in NMD isoforms of *Ptbp2* (A), *Hnrnp1* (B), and *Tra2b* (C) from 0.05  $\mu\text{M}$ , while Non-NMD isoforms remained largely unchanged. Data were shown as mean  $\pm$  SEM of three biological replicates. \*,  $p < 0.05$ , \*\*,  $p < 0.01$ , Student's t test.

**Figure S4**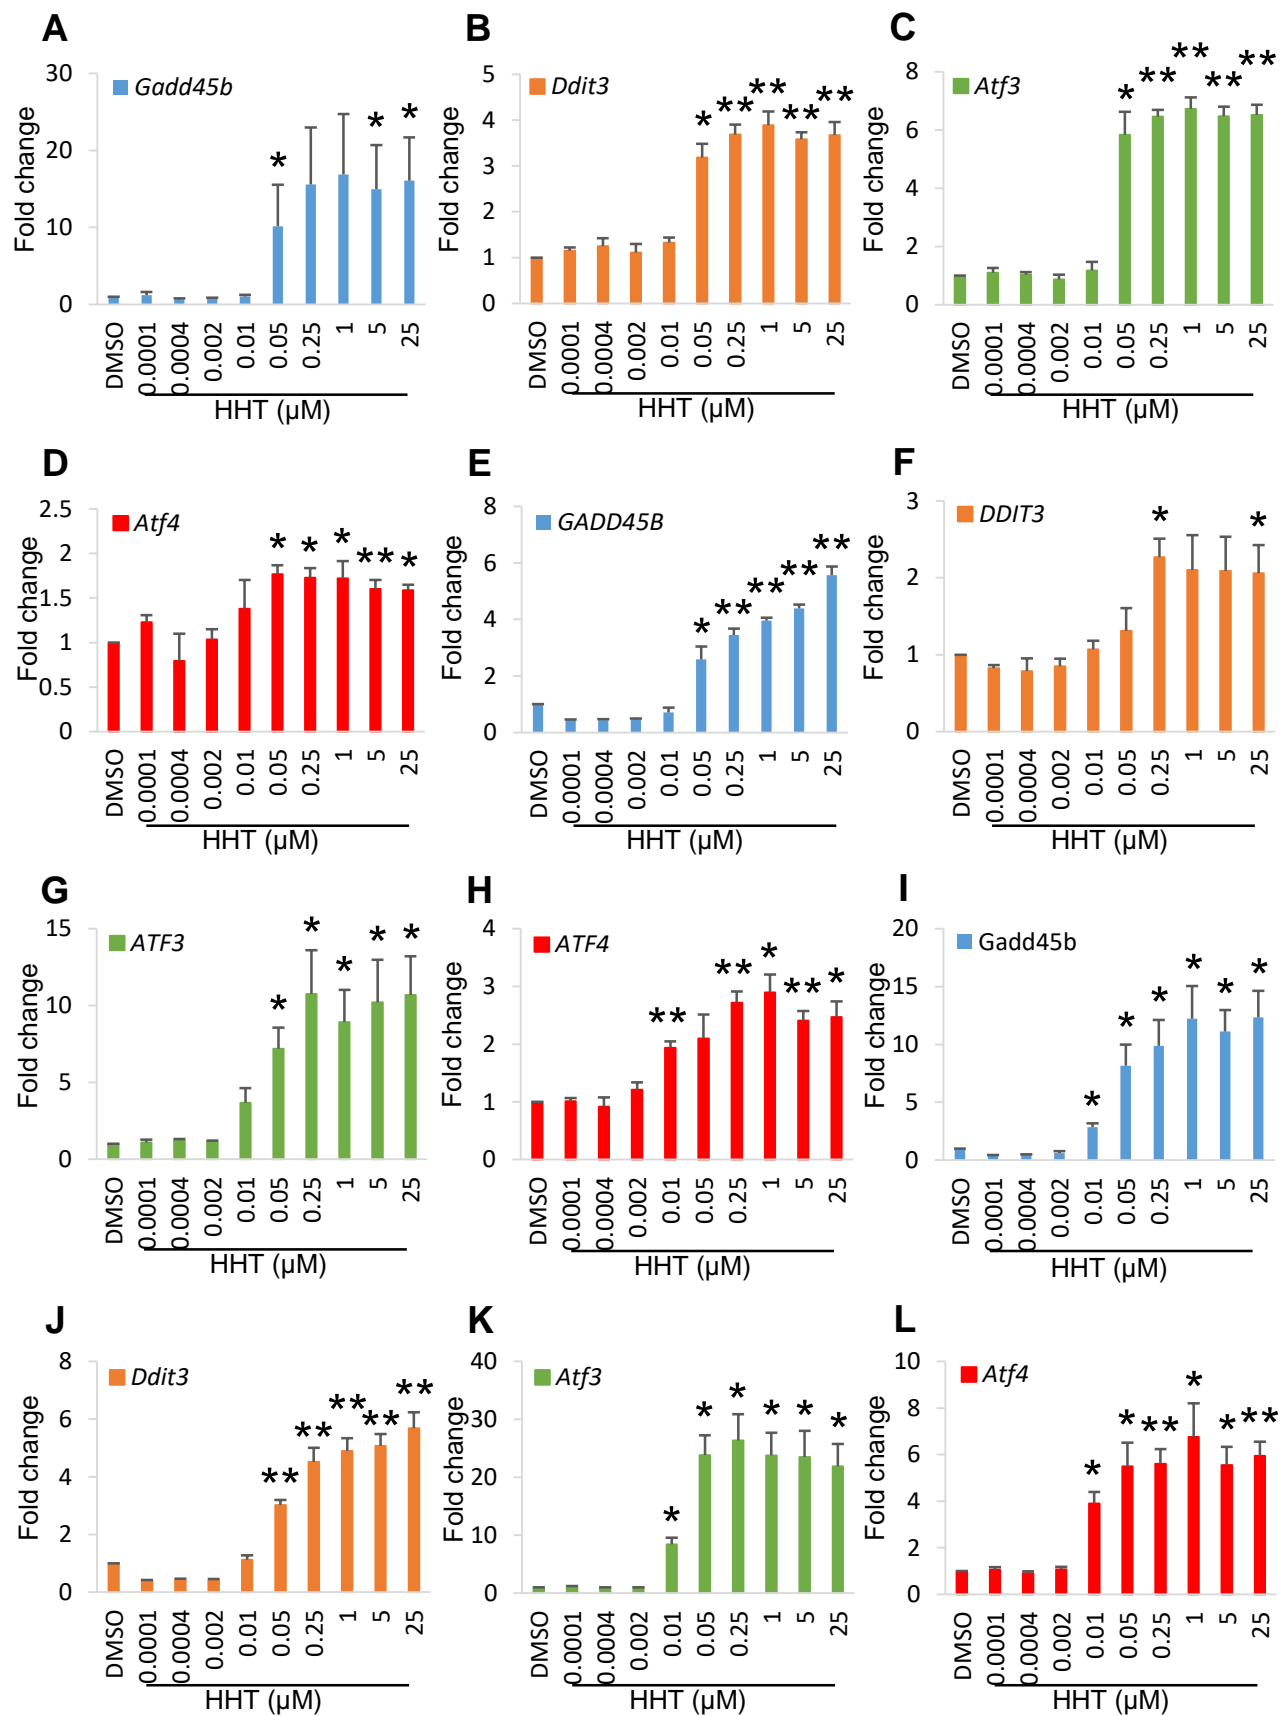**Figure S4.** HHT upregulated additional NMD targets.

(A-D) HHT treatment in N2a cells induced a dosage dependent upregulation in the expression level of *Gadd45b* (A), *Ddit3* (B), *Atf3* (C), and *Atf4* (D) from 0.05  $\mu\text{M}$ . (E-H) In 293T cells, HHT triggered

gene expression upregulation of *GADD45B* (E), *DDIT3* (F), *ATF3* (G), and *ATF4* (H). (I-L) From as low as 0.01  $\mu$ M, expression level of *Gadd45b* (I), *Ddit3* (J), *Aff3* (K), and *Atf4* (L) in mouse NPCs showed sensitive responses to HHT treatment. Data were shown as mean  $\pm$  SEM of three biological replicates. \*,  $p < 0.05$ , \*\*,  $p < 0.01$ , Student's t test.

**Figure S5**

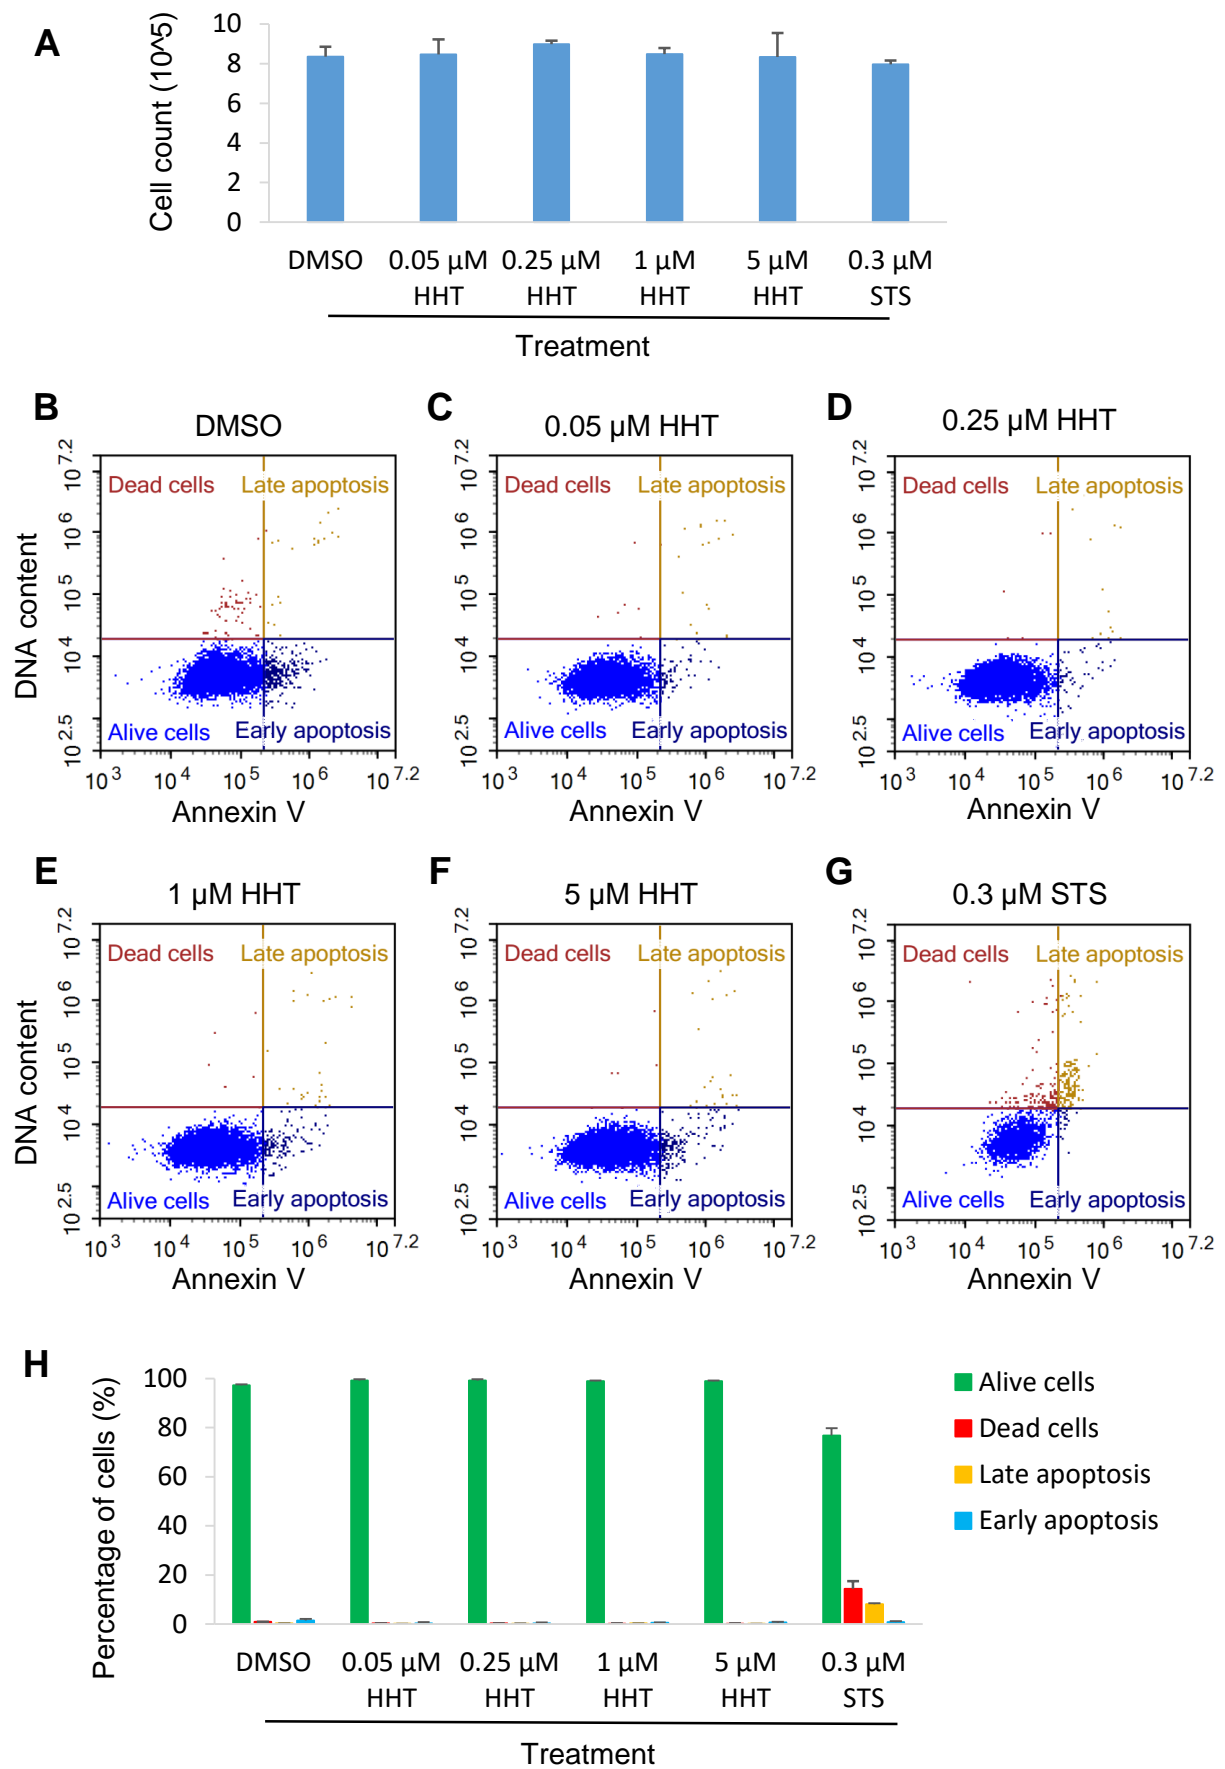

**Figure S5.** HHT does not induce cytotoxicity while inhibiting NMD.

**(A)** Cell counts of groups treated with DMSO, different dosage of HHT, and STS. No differences



were observed. **(B-H)** Annexin V apoptosis labeling showed all HHT treated groups had a similar amount of dead and apoptotic cells as the DMSO treated group, while the STS treated group had a higher percentage of cell death and apoptosis. Data were shown as mean  $\pm$  SEM of three biological replicates.

**Figure S6**

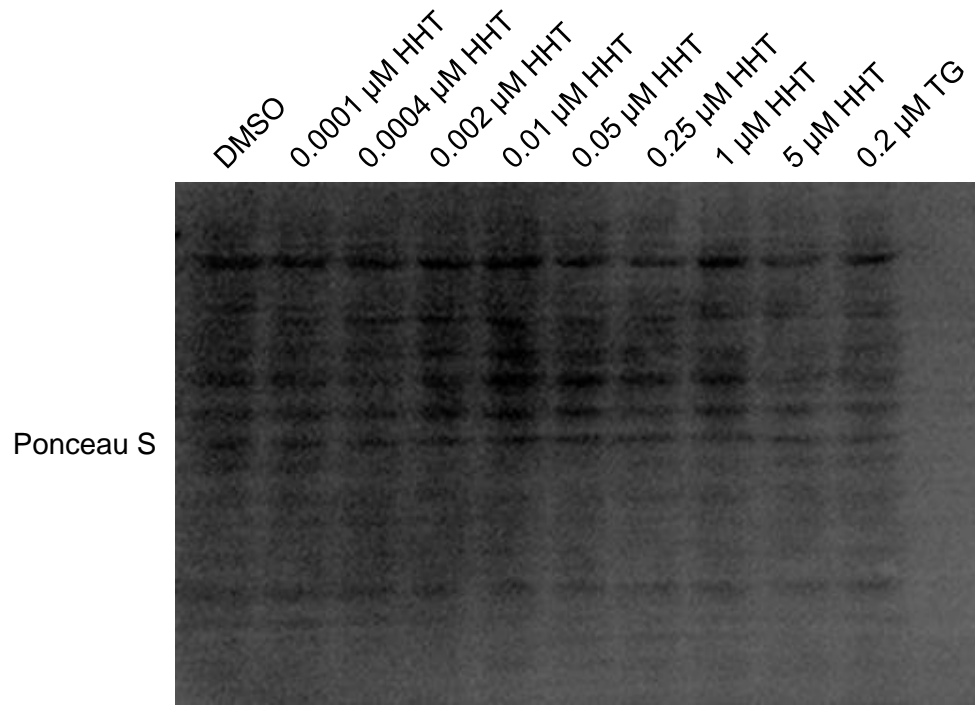

**Figure S6.** Total protein loading in puromycin experiments.

Ponceau S staining showed all samples had a similar amount of total protein loaded to the SDS-PAGE gel for Western blot analysis.
